# Supplementary material for: Drought-induced biomass burning as a source of black carbon to the Central Himalaya since 1781 CE as reconstructed from the Dasuopu Ice Core
Source: Copernicus journal article supplement (doi:10.5194/acp-2020-1052), 2020-10-20
Supplement: Supplementary file 1 [file acp-2020-1052-supplement.pdf]

1 Supplemental Figure 1:

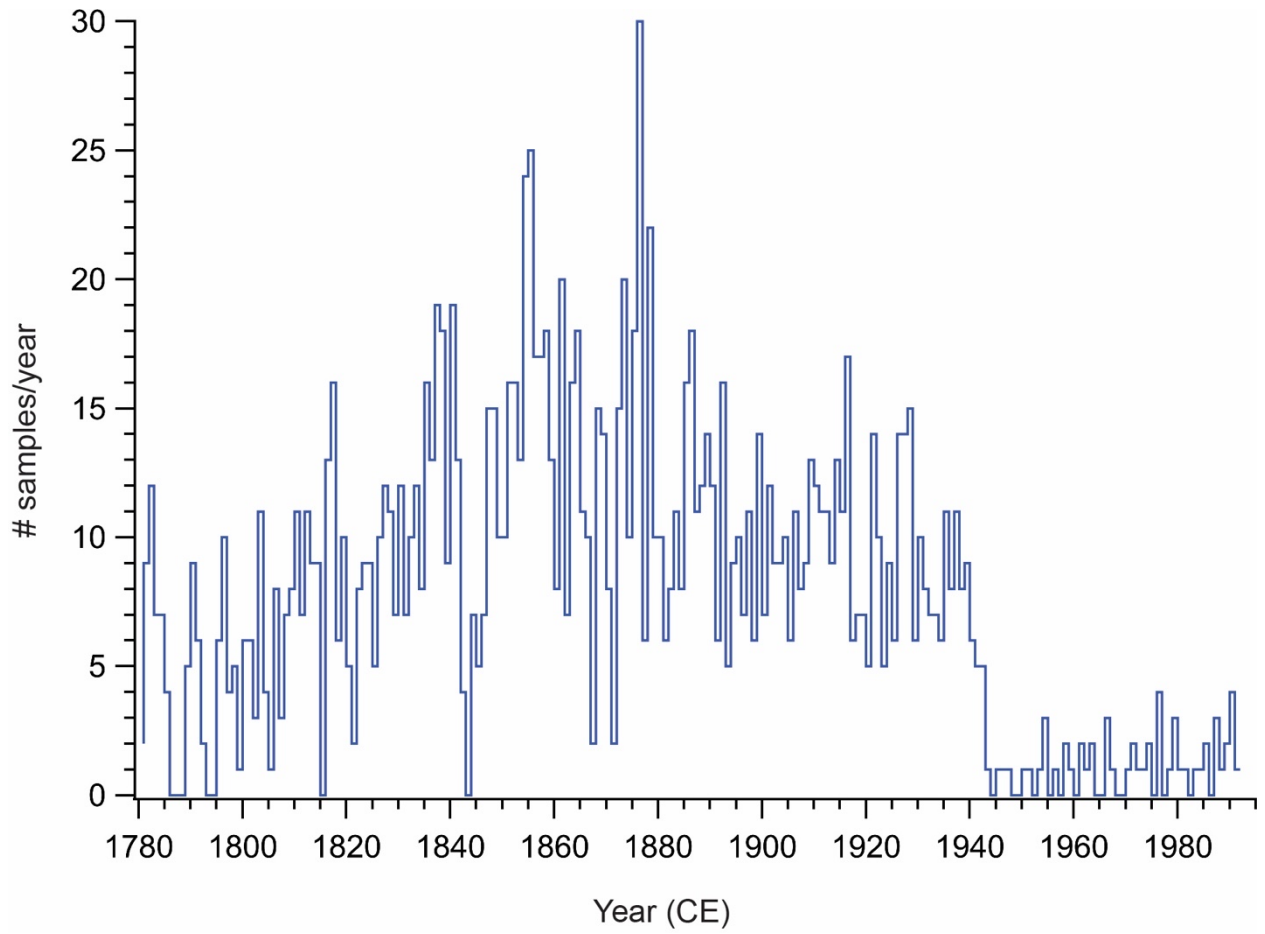

2

3

4 Suppl. Fig. 1: The number of samples per year in the Dasuopu ice core. The firn-ice  
5 transition occurs in 1943.

6

7 Supplemental Figure 2:

8

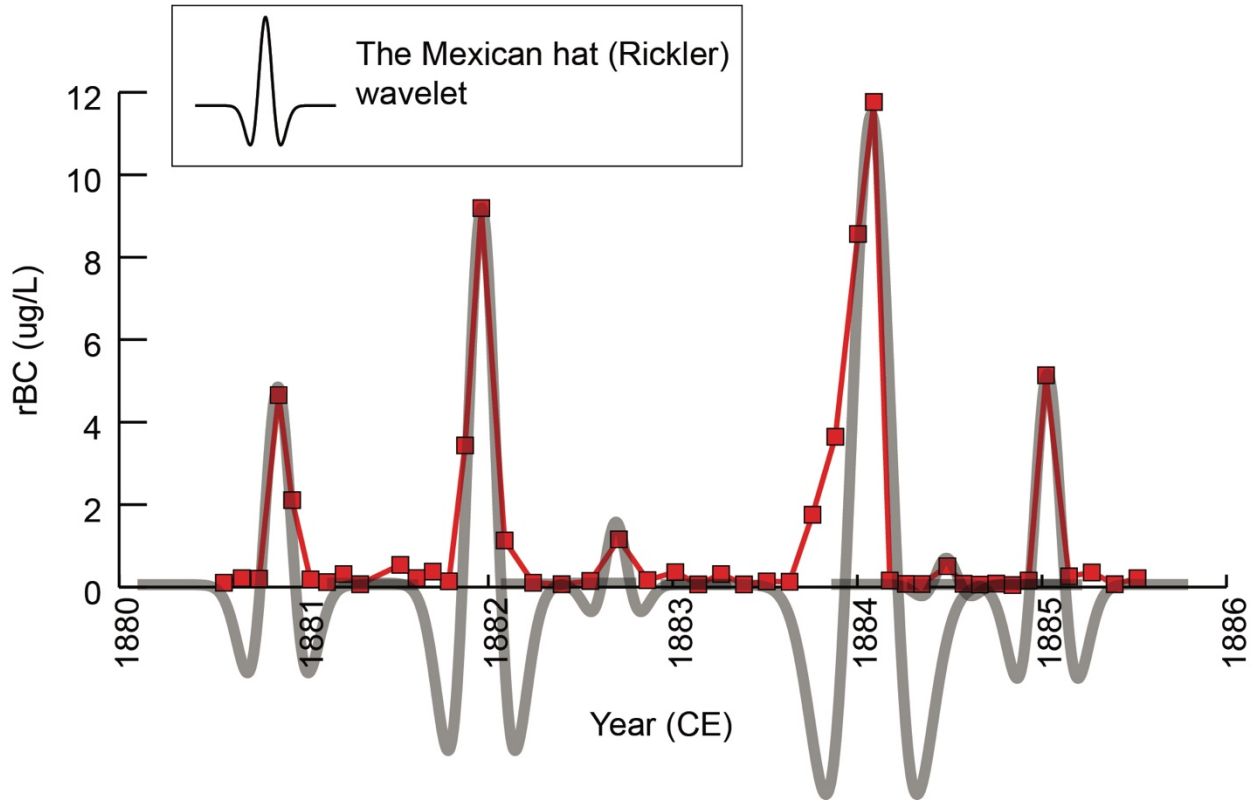

9

10 Suppl. Fig. 2: The shape of the Mexican hat (Rickler) wavelet (inset) and an example of  
11 how its shape fits the rBC peaks (red) at various scales (grey) in the Dasuopu record.  
12

13

14 Supplemental Figure 3:

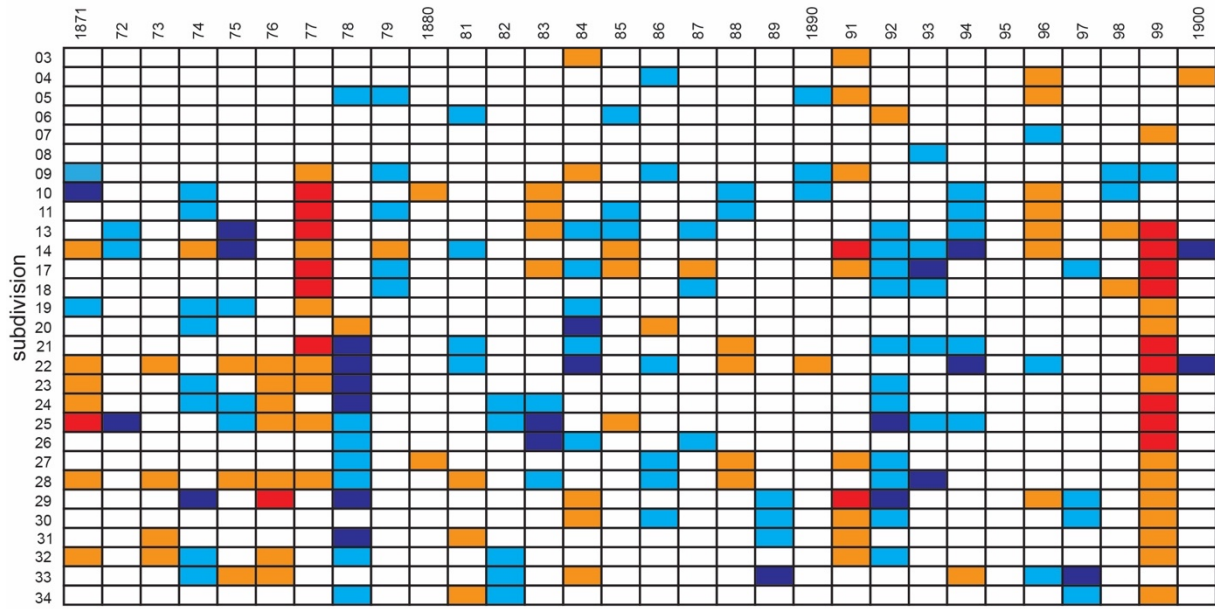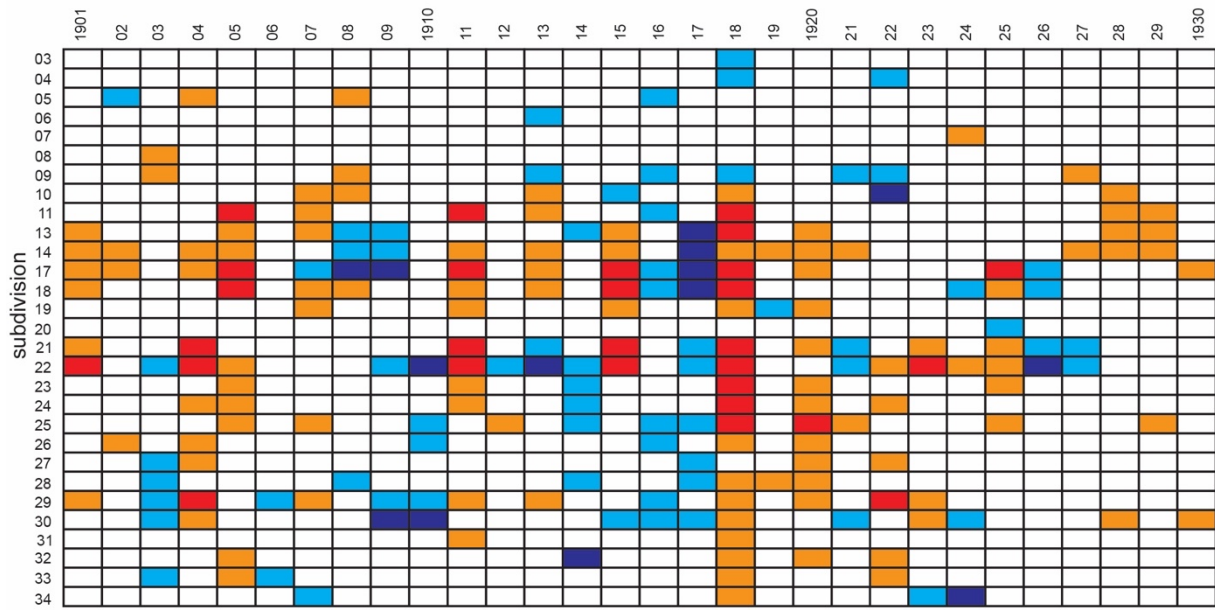

15

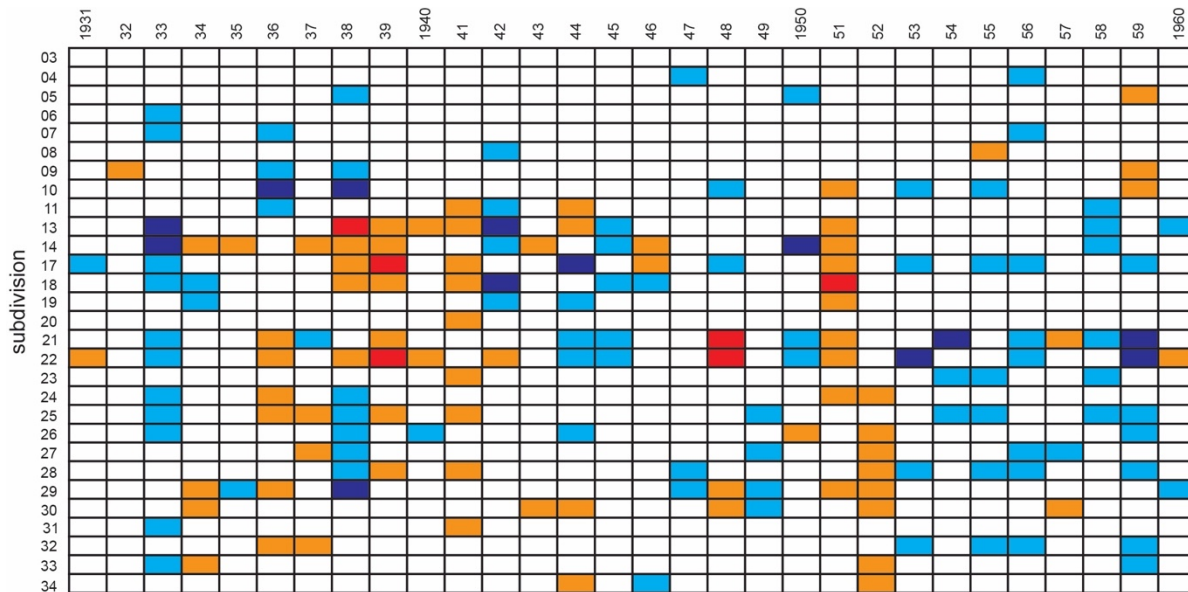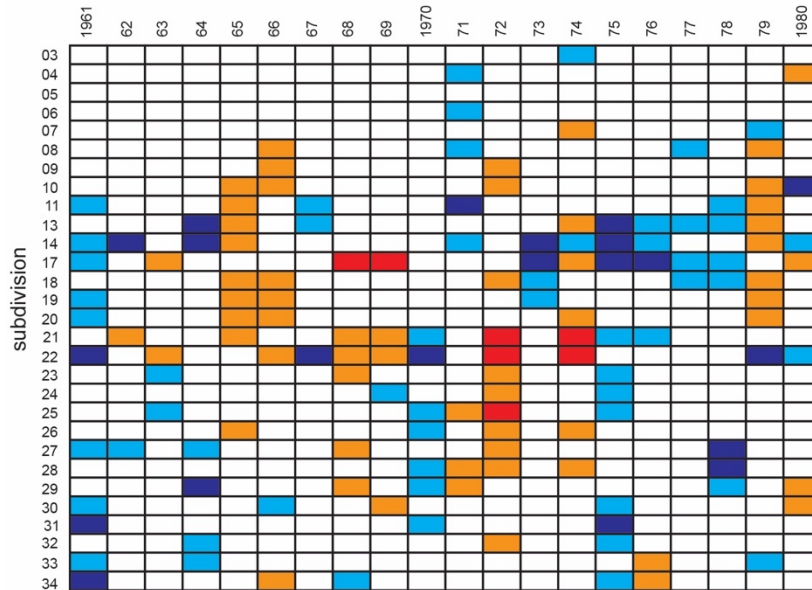

- severe flood ( $\geq 51$  % of normal)
- moderate flood (between  $\geq 26$  and  $\leq 50$  % of normal)
- moderate drought (between  $\leq -26$  and  $\geq -51$  % of normal)
- severe drought ( $\leq -51$  % of normal)

| subdivision number | subdivision name          |
|--------------------|---------------------------|
| 3                  | north Assam               |
| 4                  | south Assam               |
| 5                  | sub-Himalayan west Bengal |
| 6                  | Gangetic west Bengal      |
| 7                  | Orissa                    |
| 8                  | Bihar Plateau             |
| 9                  | Bihar Plains              |
| 10                 | east Uttar Pradesh        |
| 11                 | west Uttar Pradesh Plains |
| 13                 | Haryana                   |
| 14                 | Punjab                    |
| 17                 | west Rajasthan            |
| 18                 | east Rajasthan            |
| 19                 | west Madhya Pradesh       |
| 20                 | east Madhya Pradesh       |
| 21                 | Gujarat                   |
| 22                 | Saurashtra & Kutch        |
| 23                 | Konkan & Goa              |
| 24                 | Madhya Maharashtra        |
| 25                 | Marathwada                |
| 26                 | Vidarbha                  |
| 27                 | coastal Andhra Pradesh    |
| 28                 | Telangana                 |
| 29                 | Rayalseema                |
| 30                 | Tamilnadu                 |
| 31                 | coastal Karnataka         |
| 32                 | north Karnataka           |
| 33                 | south Karnataka           |
| 34                 | Kerala                    |

16  
17  
18

b)

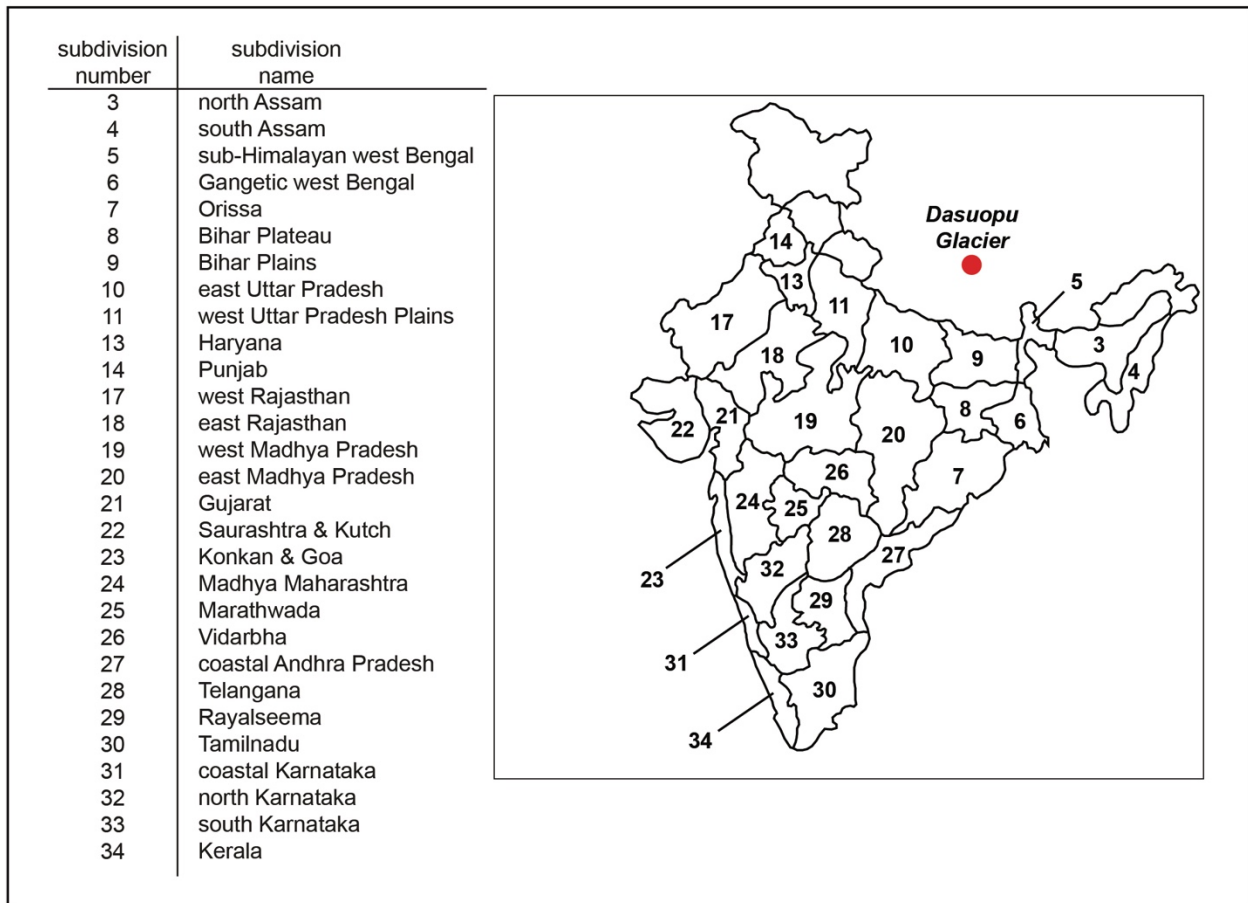

19

20 Suppl. Fig. 3: a) The occurrence of droughts and floods reported from meteorological  
 21 subdivisions in India from 1871 – 1980; b) The name and location of meteorological  
 22 subdivisions in India (taken from Parthasarathy et al., 1987).

23

24 Supplemental Table 1.

| <b>Year<br/>(CE)</b> | <b>Depth in core<br/>(m from surface)</b> |
|----------------------|-------------------------------------------|
| 1938.35              | 60.48 - 60.52                             |
| 1921.32              | 69.79 - 69.84                             |
| 1909.32              | 76.02 - 76.06                             |
| 1892.96              | 83.45 - 83.48                             |
| 1890.94              | 84.24 - 84.26                             |
| 1870.69              | 93.34 - 93.38                             |
| 1867.83              | 94.53 - 94.56                             |
| 1867.78              | 94.56 - 94.59                             |
| 1863.00              | 96.64 - 96.66                             |
| 1847.32 - 1846.84    | 103.58 - 103.80                           |
| 1841.17              | 105.88 - 105.90                           |
| 1838.81 - 183.76     | 106.82 - 106.88                           |
| 1833.16 - 1833.07    | 108.92 - 108.98                           |
| 1826.41              | 111.02 - 111.05                           |
| 1819.82              | 113.03 - 113.05                           |
| 1811.82              | 115.25 - 115.28                           |
| 1806.42 - 1805.88    | 116.20 - 116.30                           |
| 1790.15 - 1787.12    | 118.78 - 119.32                           |

25

26 Suppl. Table 1: The sampling interval and corresponding dates of missing samples in  
 27 the ice core section of the Dasuopu core.  
 28
